# Supplementary material for: Tunable peptoid microspheres: effects of side chain chemistry and sequence
Source: Royal Society of Chemistry journal article supplement (doi:10.1039/c3ob40561c), 2013-01-01

### **HPLC and MALDI data for peptoids**

All HPLC traces were obtained using a reversed-phased analytical HPLC (Waters Alliance, Milford, MA) with a Duragel G C18 150 x 2.1 mm column (Peeke Scientific, Novato, CA) and a linear gradient of 5 to 95% solvent B (acetonitrile, 0.1% TFA) in solvent A (water, 0.1% TFA) over 30 min.

Mass spectrometry data was obtained by matrix-assisted laser desorption/ionization.

**P1**

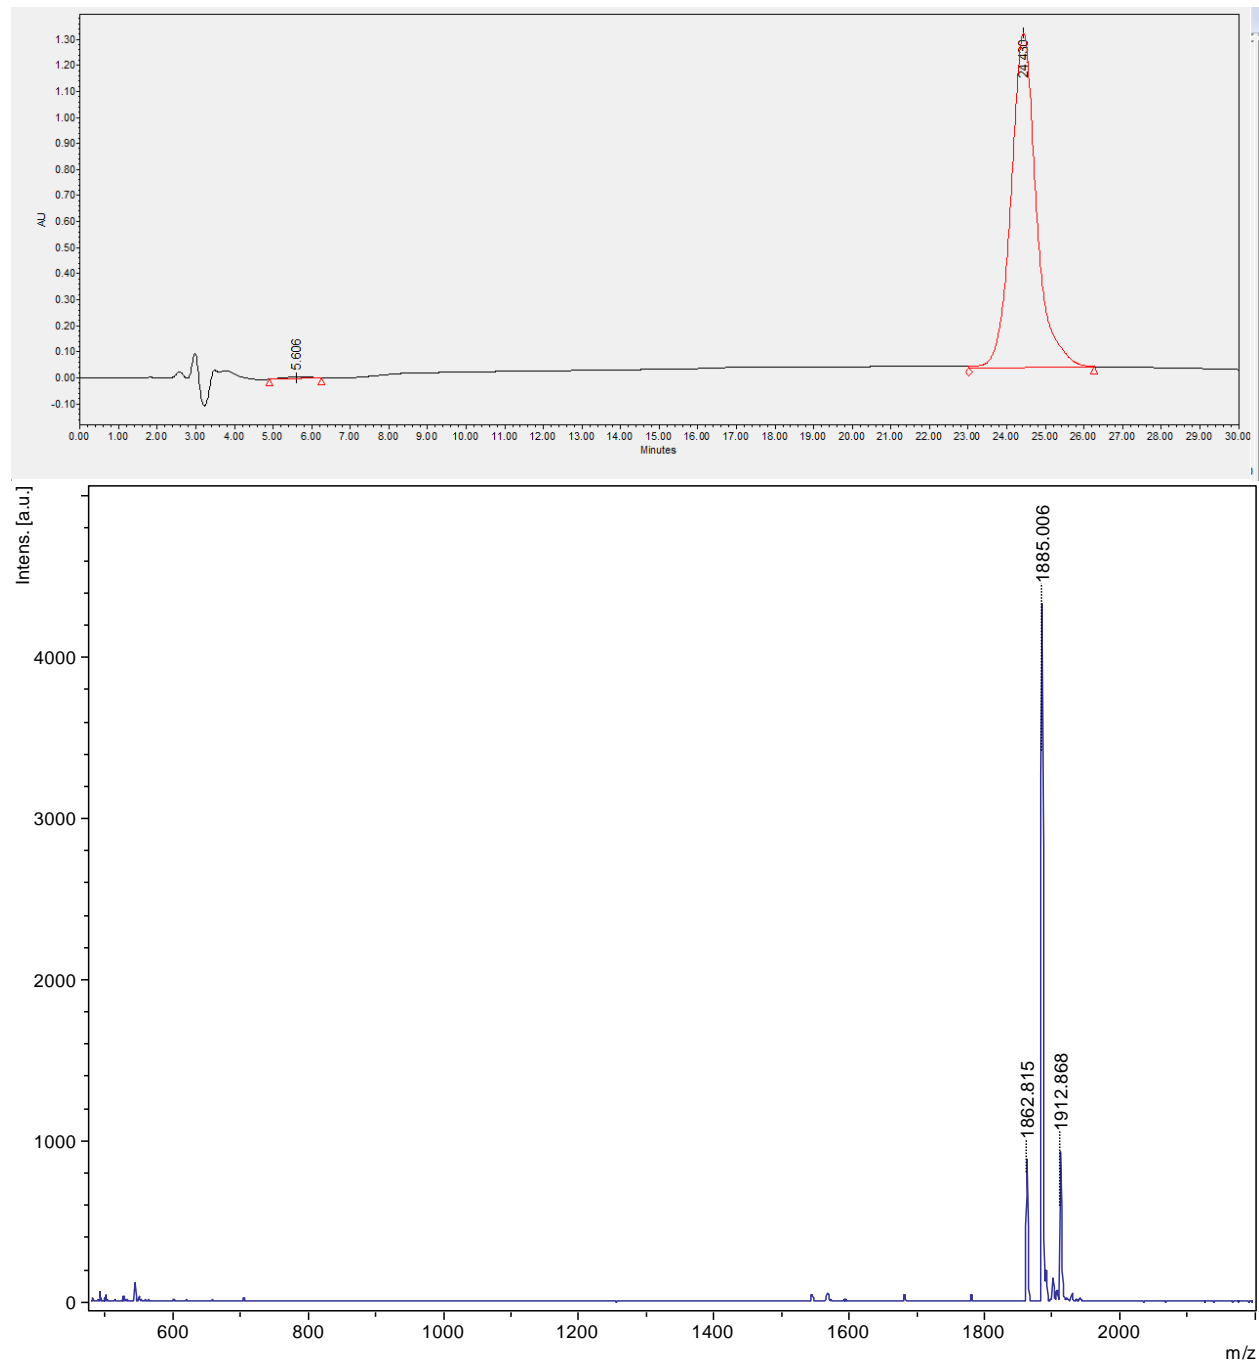

WP1

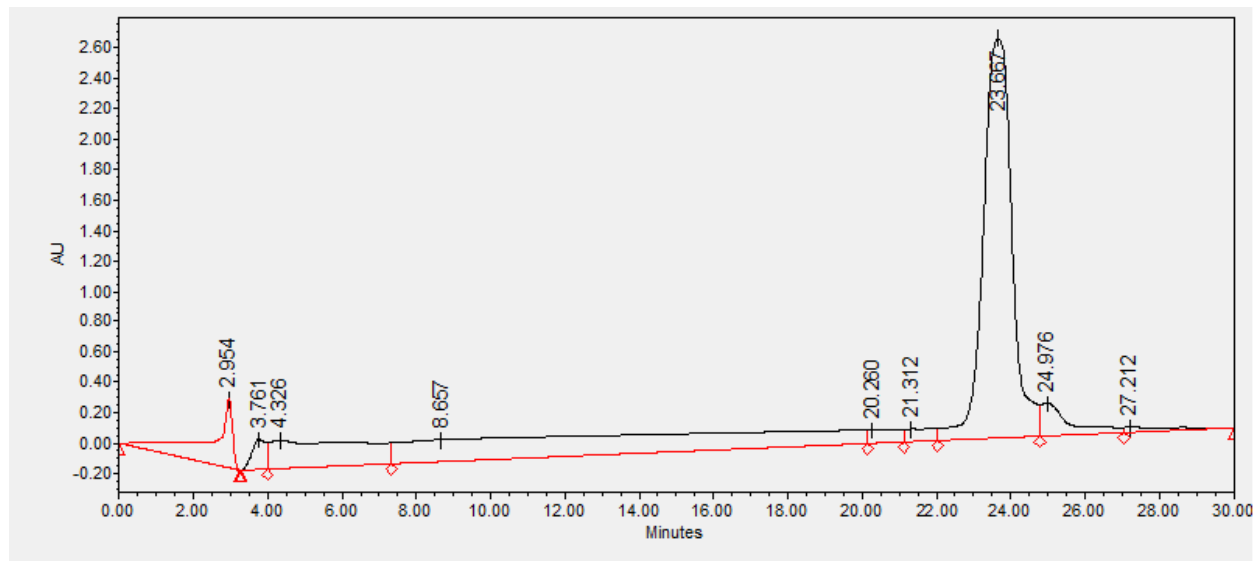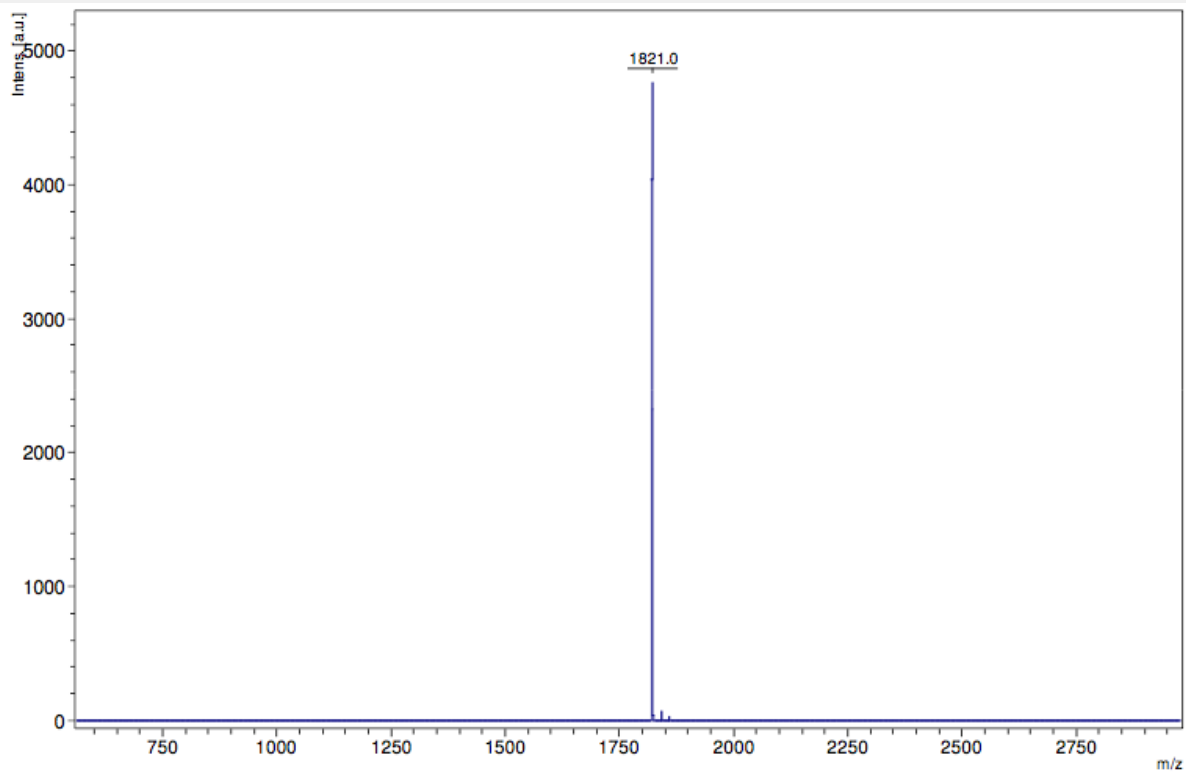

rP1

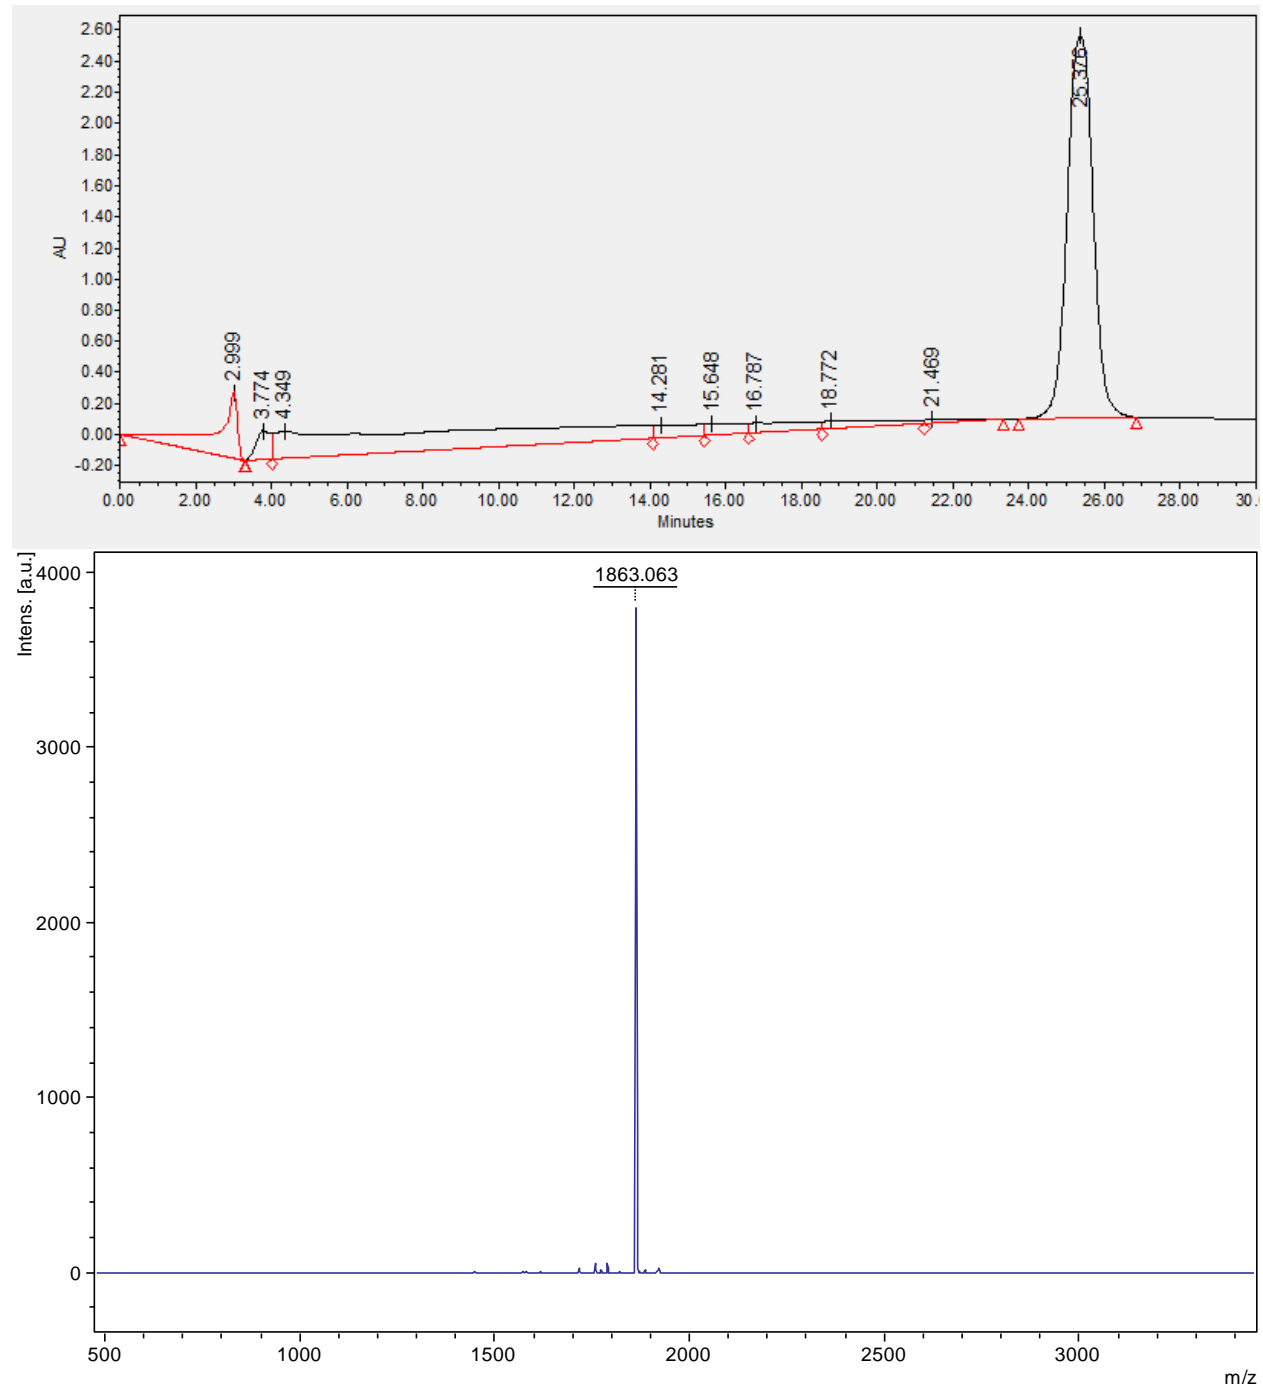

P2

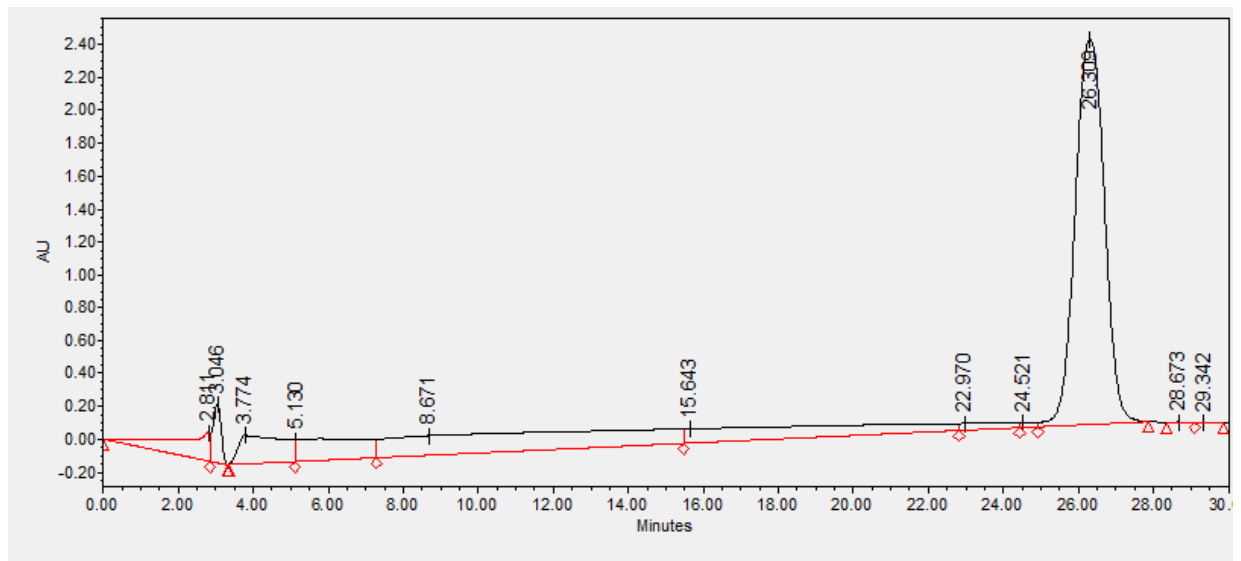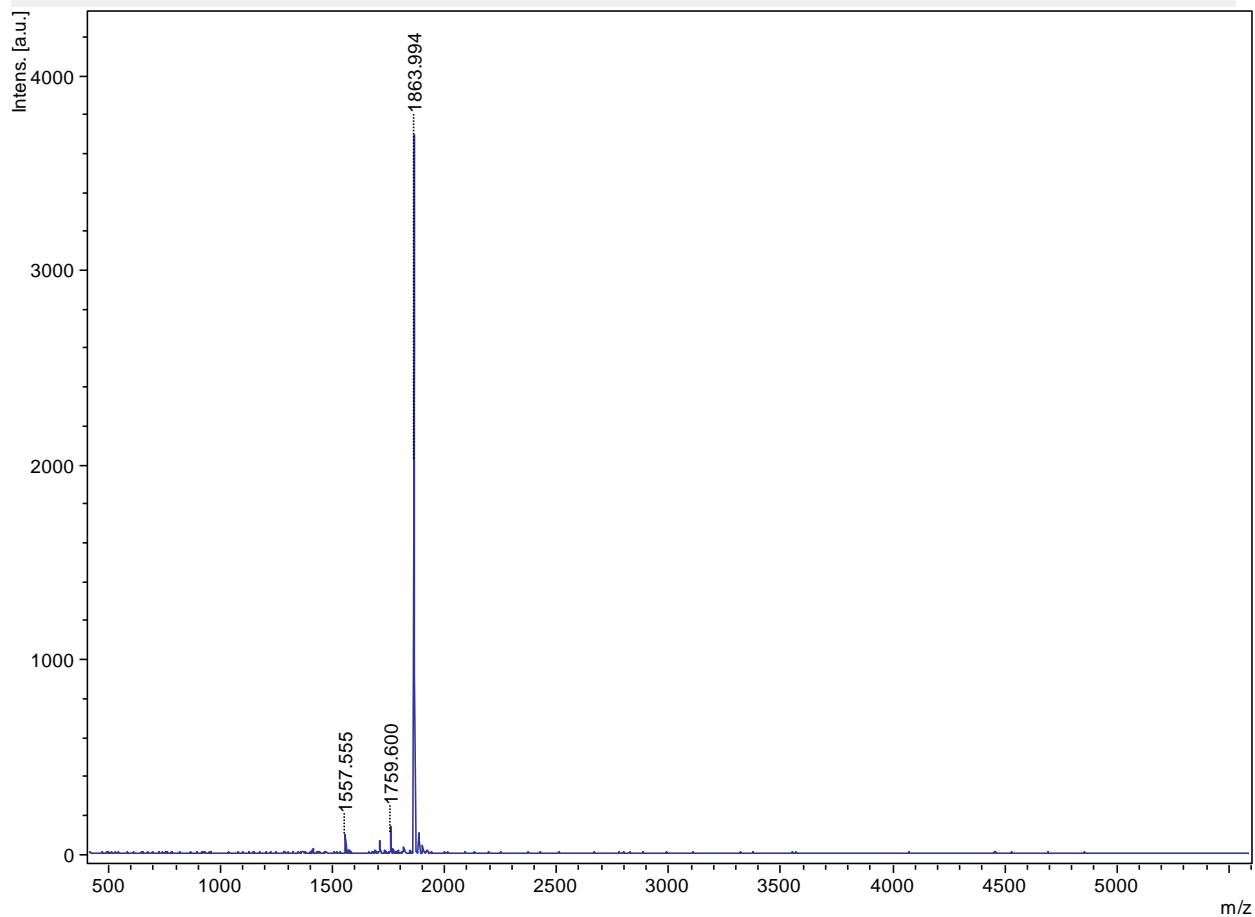

rP2

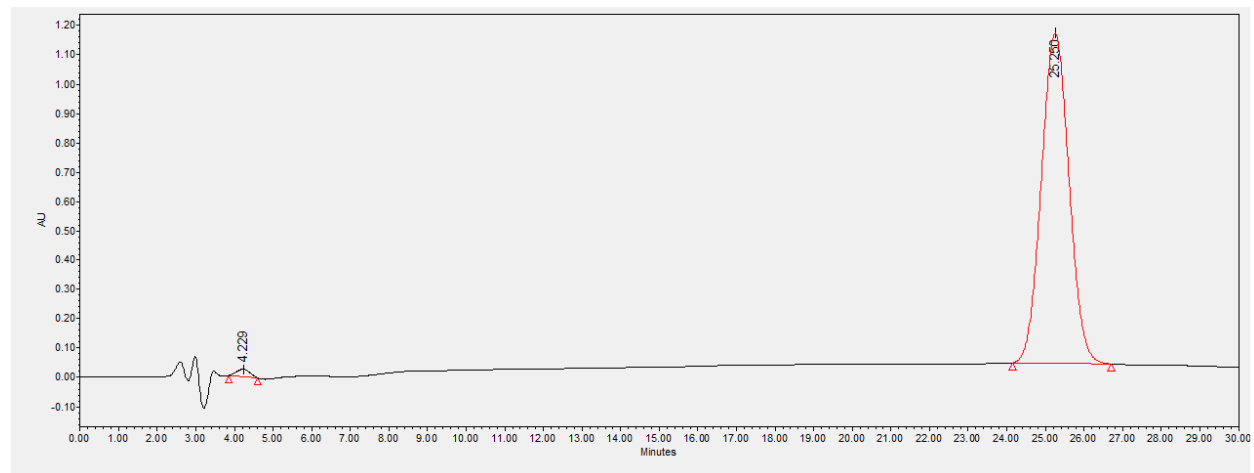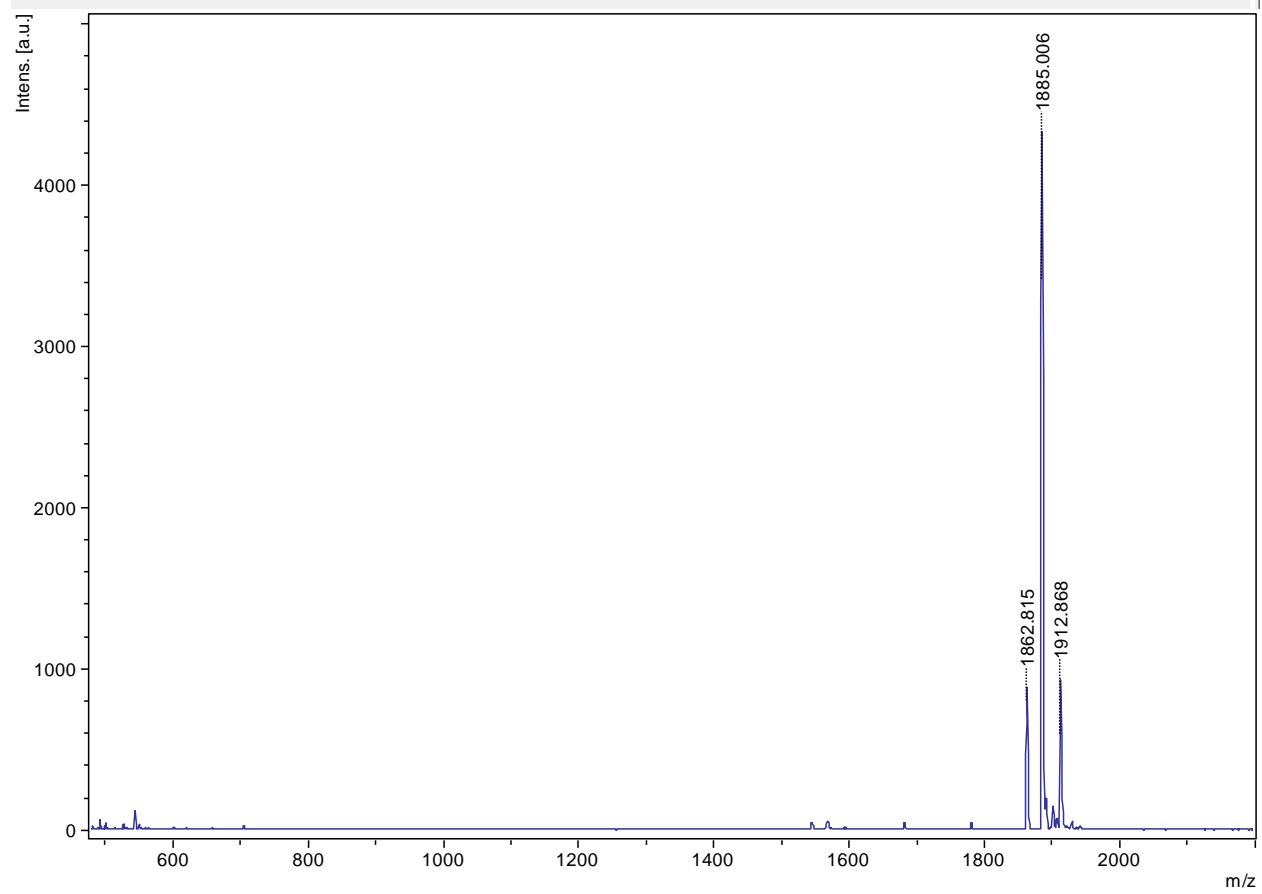

P3

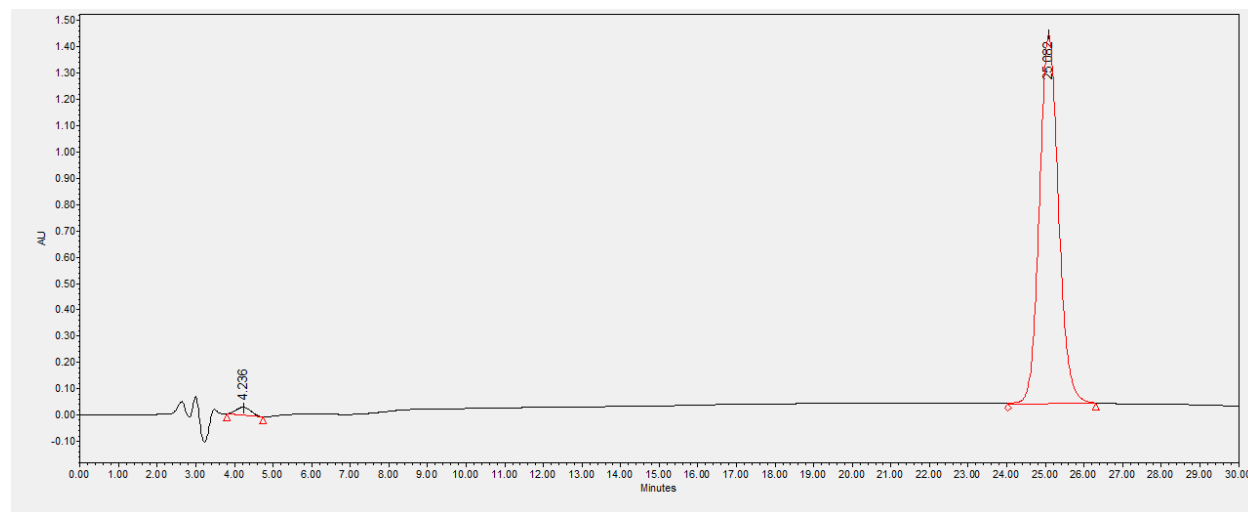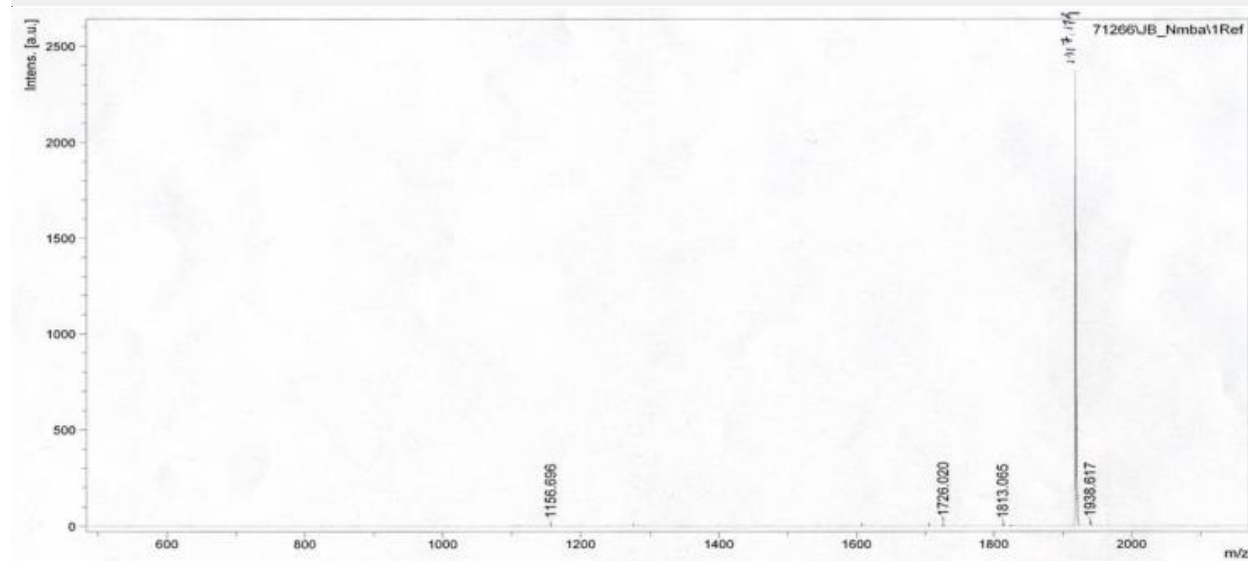

**P4**

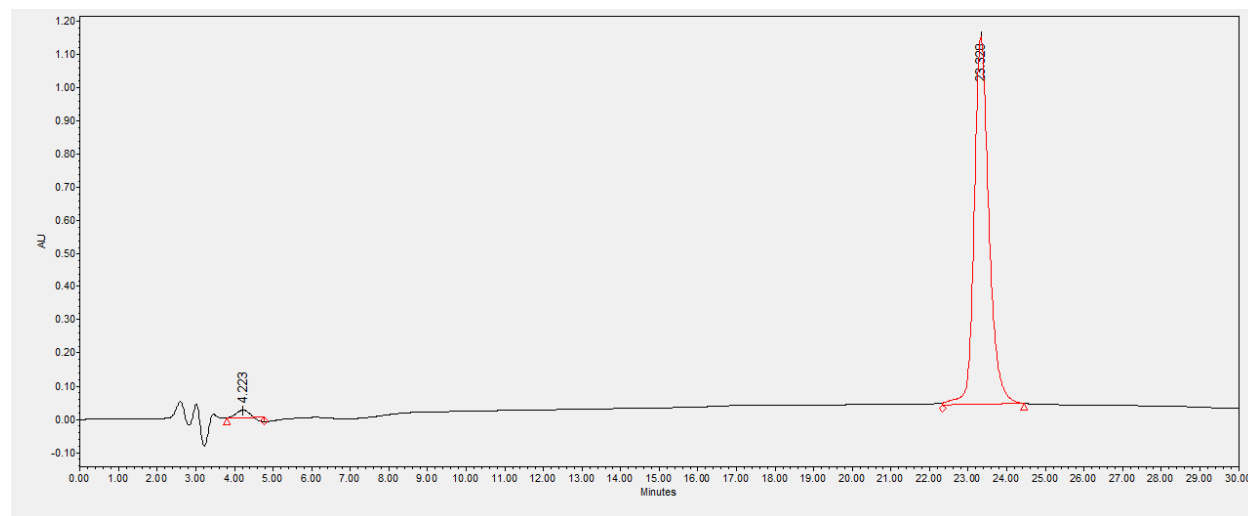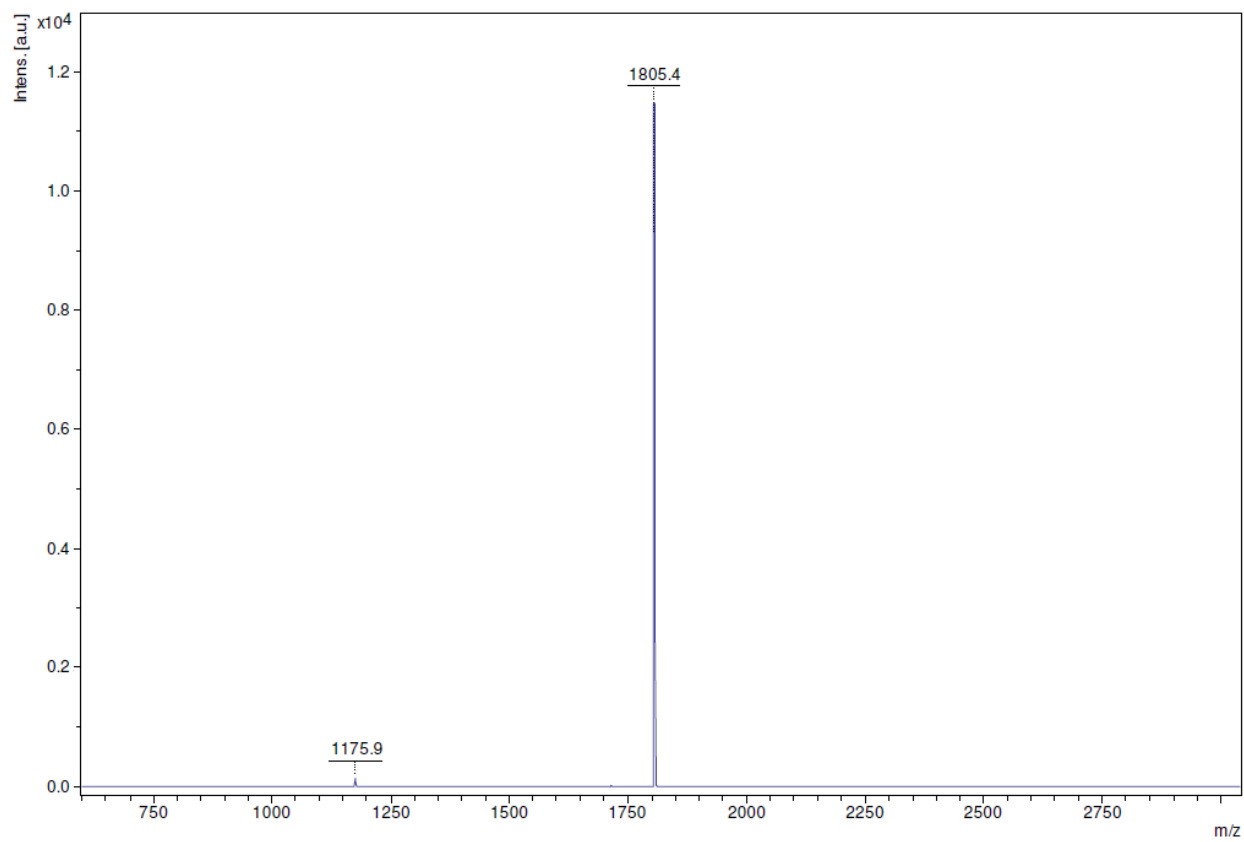



**P3 microspheres from a 5 mg/mL solution of (A) 4:1 ethanol:water (B) 4:1 isopropanol:water.**

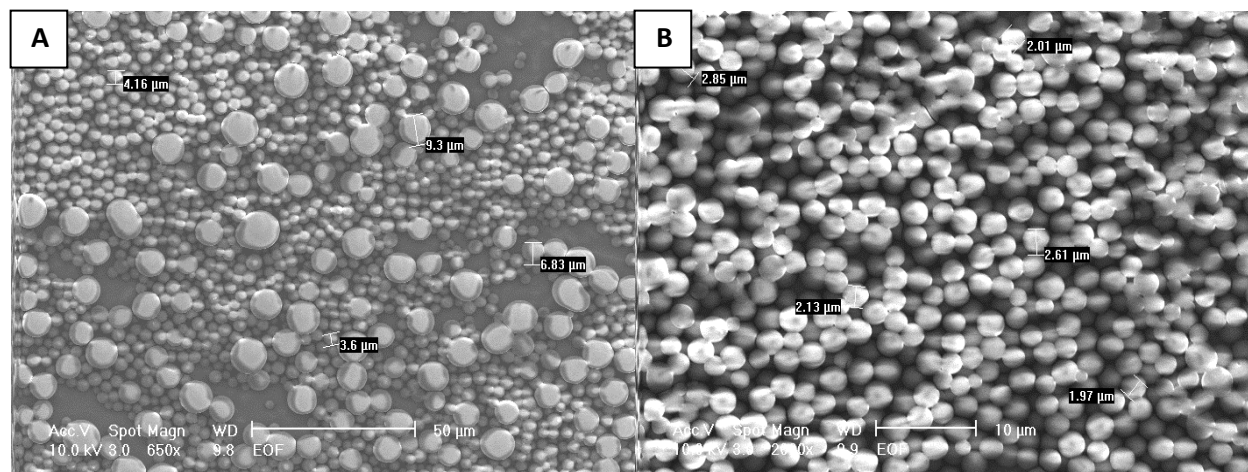

Supplement: c3ob40561c.pdf [file c3ob40561c.pdf]
